# Supplementary material for: Comprehensive analysis of interacting proteins and genome-wide location studies of the Sas3-dependent NuA3 histone acetyltransferase complex
Source: PubMed Central journal article supplement — FEBS Open Bio. 2014 Nov 8;4:996–1006. doi: 10.1016/j.fob.2014.11.001 (PMC4248121; doi:10.1016/j.fob.2014.11.001), 2014-11-08
Supplement: mmc1.pdf [file mmc1.pdf]

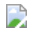

# Mascot Search Results

User : Luz Valero  
 Email : lvalero@cipf.es  
 Search title : Project: MLV, Spot Set: MLV\LC 100803  
 MS data file : MGF combinado.txt  
 Database : Sprout 20100224 (514789 sequences; 181163771 residues)  
 Taxonomy : Saccharomyces Cerevisiae (baker's yeast) (6552 sequences)  
 Timestamp : 6 Aug 2010 at 11:24:49 GMT  
 Enzyme : Trypsin  
 Variable modifications : Deamidated (NQ), Oxidation (M)  
 Mass values : Monoisotopic  
 Protein Mass : Unrestricted  
 Peptide Mass Tolerance : ± 100 ppm  
 Fragment Mass Tolerance : ± 0.6 Da  
 Max Missed Cleavages : 1  
 Instrument type : MALDI-TOF-TOF  
 Number of queries : 1679  
 Protein hits : [YL455 YEAST](#) PWWP domain-containing protein YLR455W OS=Saccharomyces cerevisiae GN=YLR455W PE=1 SV=1  
[H2B1 YEAST](#) Histone H2B.1 OS=Saccharomyces cerevisiae GN=HTB1 PE=1 SV=2  
[RL13A YEAST](#) 60S ribosomal protein L13-A OS=Saccharomyces cerevisiae GN=RPL13A PE=1 SV=1  
[RL4A YEAST](#) 60S ribosomal protein L4-A OS=Saccharomyces cerevisiae GN=RPL4A PE=1 SV=4  
[H4 YEAST](#) Histone H4 OS=Saccharomyces cerevisiae GN=HHF1 PE=1 SV=2  
[TAF14 YEAST](#) Transcription initiation factor TFIID subunit 14 OS=Saccharomyces cerevisiae GN=TAF14 PE=1 SV=1  
[RL12 YEAST](#) 60S ribosomal protein L12 OS=Saccharomyces cerevisiae GN=RPL12A PE=1 SV=1  
[RL19 YEAST](#) 60S ribosomal protein L19 OS=Saccharomyces cerevisiae GN=RPL19A PE=1 SV=5  
[RL14A YEAST](#) 60S ribosomal protein L14-A OS=Saccharomyces cerevisiae GN=RPL14A PE=1 SV=1  
[RLA0 YEAST](#) 60S acidic ribosomal protein P0 OS=Saccharomyces cerevisiae GN=RPP0 PE=1 SV=1  
[RL33B YEAST](#) 60S ribosomal protein L33-B OS=Saccharomyces cerevisiae GN=RPL33B PE=1 SV=2  
[RS5 YEAST](#) 40S ribosomal protein S5 OS=Saccharomyces cerevisiae GN=RPS5 PE=1 SV=3  
[RS17A YEAST](#) 40S ribosomal protein S17-A OS=Saccharomyces cerevisiae GN=RPS17A PE=1 SV=1  
[RIM1 YEAST](#) Single-stranded DNA-binding protein RIM1, mitochondrial OS=Saccharomyces cerevisiae GN=RIM1 PE=1 SV=1  
[H2A1 YEAST](#) Histone H2A.1 OS=Saccharomyces cerevisiae GN=HTA1 PE=1 SV=2  
[ACT YEAST](#) Actin OS=Saccharomyces cerevisiae GN=ACT1 PE=1 SV=1  
[RL6A YEAST](#) 60S ribosomal protein L6-A OS=Saccharomyces cerevisiae GN=RPL6A PE=1 SV=2  
[H3 YEAST](#) Histone H3 OS=Saccharomyces cerevisiae GN=HHT1 PE=1 SV=2  
[RL1 YEAST](#) 60S ribosomal protein L1 OS=Saccharomyces cerevisiae GN=RPL1A PE=1 SV=1  
[RL39 YEAST](#) 60S ribosomal protein L39 OS=Saccharomyces cerevisiae GN=RPL39 PE=1 SV=3  
[RS15 YEAST](#) 40S ribosomal protein S15 OS=Saccharomyces cerevisiae GN=RPS15 PE=1 SV=1  
[RL7A YEAST](#) 60S ribosomal protein L7-A OS=Saccharomyces cerevisiae GN=RPL7A PE=1 SV=3  
[EAF6 YEAST](#) Chromatin modification-related protein EAF6 OS=Saccharomyces cerevisiae GN=EAF6 PE=1 SV=1  
[RL25 YEAST](#) 60S ribosomal protein L25 OS=Saccharomyces cerevisiae GN=RPL25 PE=1 SV=4  
[RL33A YEAST](#) 60S ribosomal protein L33-A OS=Saccharomyces cerevisiae GN=RPL33A PE=1 SV=3  
[RL18 YEAST](#) 60S ribosomal protein L18 OS=Saccharomyces cerevisiae GN=RPL18A PE=1 SV=1  
[RL27A YEAST](#) 60S ribosomal protein L27-A OS=Saccharomyces cerevisiae GN=RPL27A PE=1 SV=1  
[PIB2 YEAST](#) Phosphatidylinositol-3-phosphate-binding protein 2 OS=Saccharomyces cerevisiae GN=PIB2 PE=1 SV=1  
[RL30 YEAST](#) 60S ribosomal protein L30 OS=Saccharomyces cerevisiae GN=RPL30 PE=1 SV=3  
[RS19A YEAST](#) 40S ribosomal protein S19-A OS=Saccharomyces cerevisiae GN=RPS19A PE=1 SV=2  
[TOR2 YEAST](#) Serine/threonine-protein kinase TOR2 OS=Saccharomyces cerevisiae GN=TOR2 PE=1 SV=3  
[TAF9 YEAST](#) Transcription initiation factor TFIID subunit 9 OS=Saccharomyces cerevisiae GN=TAF9 PE=1 SV=1  
[RDH54 YEAST](#) DNA repair and recombination protein RDH54 OS=Saccharomyces cerevisiae GN=RDH54 PE=1 SV=2  
[GAL7 YEAST](#) Galactose-1-phosphate uridylyltransferase OS=Saccharomyces cerevisiae GN=GAL7 PE=1 SV=4  
[YNG1 YEAST](#) Protein YNG1 OS=Saccharomyces cerevisiae GN=YNG1 PE=1 SV=1  
[RL20 YEAST](#) 60S ribosomal protein L20 OS=Saccharomyces cerevisiae GN=RPL20A PE=1 SV=2  
[RS29A YEAST](#) 40S ribosomal protein S29-A OS=Saccharomyces cerevisiae GN=RPS29A PE=1 SV=3

## Select Summary Report

Format As

Select Summary (protein hits) ▾

[Help](#)

Significance threshold p <  Max. number of hits

Standard scoring  MudPIT scoring  Ions score or expect cut-off  Show sub-sets

Show pop-ups  Suppress pop-ups  Sort unassigned  Require bold red

1. [YL455 YEAST](#) Mass: 35487 Score: 2192 Queries matched: 62 emPAI: 19.58

PWWP domain-containing protein YLR455W OS=Saccharomyces cerevisiae GN=YLR455W PE=1 SV=1

| Query                | Observed  | Mr(expt)  | Mr(calc)  | ppm    | Miss | Score | Expect   | Rank | Peptide                                                                                                             |
|----------------------|-----------|-----------|-----------|--------|------|-------|----------|------|---------------------------------------------------------------------------------------------------------------------|
| <a href="#">15</a>   | 823.3502  | 822.3429  | 822.3508  | -9.59  | 0    | 19    | 0.25     | 1    | K.FEENR.L <a href="#">16</a> <a href="#">17</a>                                                                     |
| <a href="#">39</a>   | 836.4243  | 835.4170  | 835.4439  | -32.19 | 0    | 52    | 0.00018  | 1    | R.ELVNAYK.E <a href="#">38</a>                                                                                      |
| <a href="#">409</a>  | 880.4697  | 879.4624  | 879.4814  | -21.61 | 1    | 29    | 0.042    | 1    | K.VKLDYSR.R <a href="#">408</a>                                                                                     |
| <a href="#">494</a>  | 922.4641  | 921.4568  | 921.5072  | -54.69 | 0    | 33    | 0.014    | 1    | K.RPFFDLK.A <a href="#">493</a>                                                                                     |
| <a href="#">559</a>  | 991.4893  | 990.4820  | 990.5498  | -68.42 | 0    | 40    | 0.0027   | 1    | R.VEISQLFR.R <a href="#">558</a>                                                                                    |
| <a href="#">587</a>  | 1011.5046 | 1010.4973 | 1010.5145 | -16.98 | 0    | 73    | 1.2e-006 | 1    | K.ETHELLNR.I <a href="#">585</a> <a href="#">586</a> <a href="#">588</a>                                            |
| <a href="#">759</a>  | 1147.6195 | 1146.6122 | 1146.6509 | -33.75 | 1    | 50    | 0.0003   | 1    | R.RVEISQLFR.R <a href="#">760</a>                                                                                   |
| <a href="#">786</a>  | 1159.6066 | 1158.5993 | 1158.6033 | -3.46  | 0    | 60    | 2.5e-005 | 1    | K.IVAGEDPFVGR.T <a href="#">784</a> <a href="#">785</a> <a href="#">787</a> <a href="#">788</a> <a href="#">789</a> |
| <a href="#">812</a>  | 1180.5673 | 1179.5600 | 1179.5771 | -14.52 | 0    | 87    | 6e-008   | 1    | R.ETPTEHEIK.E <a href="#">811</a> <a href="#">813</a>                                                               |
| <a href="#">1178</a> | 1515.6888 | 1514.6815 | 1514.7042 | -14.95 | 0    | 124   | 8.2e-012 | 1    | K.NFDDFNVFLQEK.F <a href="#">1177</a> <a href="#">1179</a>                                                          |
| <a href="#">1182</a> | 1516.6487 | 1515.6414 | 1515.6882 | -30.84 | 0    | (107) | 3.7e-010 | 1    | K.NFDDFNVFLQEK.F <a href="#">1181</a>                                                                               |
| <a href="#">1238</a> | 1586.8018 | 1585.7945 | 1585.7947 | -0.12  | 0    | 32    | 0.014    | 1    | K.SNEESKPNIKPSK.K <a href="#">1237</a>                                                                              |
| <a href="#">1259</a> | 1616.7670 | 1615.7597 | 1615.7689 | -5.68  | 1    | 103   | 1.3e-009 | 1    | K.NSISIKEDPEDNQK.S <a href="#">1260</a>                                                                             |
| <a href="#">1276</a> | 1643.9235 | 1642.9162 | 1642.9181 | -1.16  | 0    | 106   | 4.6e-010 | 1    | K.EILLSWADLITELK.K <a href="#">1275</a>                                                                             |
| <a href="#">1299</a> | 1683.9072 | 1682.8999 | 1682.8933 | 3.92   | 0    | 84    | 9.4e-008 | 1    | K.VGSFPPWPAVFPQR.L <a href="#">1300</a> <a href="#">1301</a> <a href="#">1302</a>                                   |
| <a href="#">1325</a> | 1714.8990 | 1713.8917 | 1713.8897 | 1.20   | 1    | 62    | 1.3e-005 | 1    | K.SNEESKPNIKPSK.K <a href="#">1323</a> <a href="#">1324</a> <a href="#">1326</a>                                    |
| <a href="#">1361</a> | 1767.8701 | 1766.8628 | 1766.8662 | -1.88  | 0    | 104   | 8.4e-010 | 1    | K.AIVNDPDLGEFHP LCK.E <a href="#">1359</a> <a href="#">1360</a> <a href="#">1362</a>                                |

|                      |                           |                           |                           |                        |                   |                     |                          |                   |                                         |                      |                      |
|----------------------|---------------------------|---------------------------|---------------------------|------------------------|-------------------|---------------------|--------------------------|-------------------|-----------------------------------------|----------------------|----------------------|
| <a href="#">1365</a> | <a href="#">1771.9667</a> | <a href="#">1770.9594</a> | <a href="#">1771.0131</a> | <a href="#">-30.30</a> | <a href="#">1</a> | <a href="#">118</a> | <a href="#">3.9e-011</a> | <a href="#">1</a> | <a href="#">K.EILLSWADLITELKK.E</a>     | <a href="#">1366</a> |                      |
| <a href="#">1435</a> | <a href="#">1872.8380</a> | <a href="#">1871.8307</a> | <a href="#">1871.9417</a> | <a href="#">-59.31</a> | <a href="#">1</a> | <a href="#">40</a>  | <a href="#">0.0023</a>   | <a href="#">1</a> | <a href="#">R.IYENS DTKRPF DLK.A</a>    | <a href="#">1436</a> |                      |
| <a href="#">1465</a> | <a href="#">1924.8684</a> | <a href="#">1923.8611</a> | <a href="#">1923.9326</a> | <a href="#">-37.17</a> | <a href="#">0</a> | <a href="#">137</a> | <a href="#">4.8e-013</a> | <a href="#">1</a> | <a href="#">K.ELDQDSIHNFILEH SK.N</a>   | <a href="#">1464</a> |                      |
| <a href="#">1559</a> | <a href="#">2166.0366</a> | <a href="#">2165.0293</a> | <a href="#">2165.1116</a> | <a href="#">-38.02</a> | <a href="#">1</a> | <a href="#">74</a>  | <a href="#">1e-006</a>   | <a href="#">1</a> | <a href="#">R.LKELDQDSIHNFILEH SK.N</a> | <a href="#">1558</a> |                      |
| <a href="#">1566</a> | <a href="#">2173.0940</a> | <a href="#">2172.0867</a> | <a href="#">2172.0811</a> | <a href="#">2.60</a>   | <a href="#">1</a> | <a href="#">72</a>  | <a href="#">1.7e-006</a> | <a href="#">1</a> | <a href="#">R.ETPTEHEIKETHELLNR.I</a>   | <a href="#">1564</a> | <a href="#">1565</a> |
| <a href="#">1609</a> | <a href="#">2320.0815</a> | <a href="#">2319.0742</a> | <a href="#">2319.0444</a> | <a href="#">12.9</a>   | <a href="#">1</a> | <a href="#">69</a>  | <a href="#">2.9e-006</a> | <a href="#">1</a> | <a href="#">K.NFDDFNVFLQEKFEENR.L</a>   | <a href="#">1610</a> |                      |

2. [H2B1 YEAST](#) Mass: 14244 Score: 597 Queries matched: 20 emPAI: 9.64  
Histone H2B.1 OS=Saccharomyces cerevisiae GN=HTB1 PE=1 SV=2

| Query                | Observed                  | Mr(expt)                  | Mr(calc)                  | ppm                    | Miss              | Score                | Expect                   | Rank              | Peptide                             |                      |                     |                     |
|----------------------|---------------------------|---------------------------|---------------------------|------------------------|-------------------|----------------------|--------------------------|-------------------|-------------------------------------|----------------------|---------------------|---------------------|
| <a href="#">3</a>    | <a href="#">816.4480</a>  | <a href="#">815.4407</a>  | <a href="#">815.4501</a>  | <a href="#">-11.50</a> | <a href="#">0</a> | <a href="#">43</a>   | <a href="#">0.0018</a>   | <a href="#">1</a> | <a href="#">R.EIQTAVR.L</a>         | <a href="#">4</a>    | <a href="#">5</a>   |                     |
| <a href="#">534</a>  | <a href="#">953.5785</a>  | <a href="#">952.5712</a>  | <a href="#">952.5957</a>  | <a href="#">-25.69</a> | <a href="#">0</a> | <a href="#">77</a>   | <a href="#">2.2e-007</a> | <a href="#">1</a> | <a href="#">R.LILPGELAK.H</a>       | <a href="#">535</a>  |                     |                     |
| <a href="#">768</a>  | <a href="#">1153.5146</a> | <a href="#">1152.5073</a> | <a href="#">1152.5339</a> | <a href="#">-23.04</a> | <a href="#">0</a> | <a href="#">66</a>   | <a href="#">5.1e-006</a> | <a href="#">1</a> | <a href="#">K.ETYSSYIYK.V</a>       | <a href="#">767</a>  | <a href="#">769</a> | <a href="#">770</a> |
| <a href="#">855</a>  | <a href="#">1211.5848</a> | <a href="#">1210.5775</a> | <a href="#">1210.5942</a> | <a href="#">-13.79</a> | <a href="#">0</a> | <a href="#">22</a>   | <a href="#">0.14</a>     | <a href="#">1</a> | <a href="#">K.QTHPDTGISQK.S</a>     | <a href="#">856</a>  |                     |                     |
| <a href="#">941</a>  | <a href="#">1281.6166</a> | <a href="#">1280.6093</a> | <a href="#">1280.6288</a> | <a href="#">-15.23</a> | <a href="#">1</a> | <a href="#">83</a>   | <a href="#">1.2e-007</a> | <a href="#">1</a> | <a href="#">R.KETYSSYIYK.V</a>      | <a href="#">942</a>  | <a href="#">944</a> |                     |
| <a href="#">1364</a> | <a href="#">1771.8693</a> | <a href="#">1770.8620</a> | <a href="#">1770.8611</a> | <a href="#">0.55</a>   | <a href="#">0</a> | <a href="#">113</a>  | <a href="#">1.3e-010</a> | <a href="#">1</a> | <a href="#">K.SMSILNSFVNDIFER.I</a> | <a href="#">1363</a> |                     |                     |
| <a href="#">1367</a> | <a href="#">1772.8547</a> | <a href="#">1771.8474</a> | <a href="#">1771.8451</a> | <a href="#">1.33</a>   | <a href="#">0</a> | <a href="#">(76)</a> | <a href="#">6.6e-007</a> | <a href="#">1</a> | <a href="#">K.SMSILNSFVNDIFER.I</a> | <a href="#">1368</a> |                     |                     |
| <a href="#">1376</a> | <a href="#">1787.8594</a> | <a href="#">1786.8521</a> | <a href="#">1786.8560</a> | <a href="#">-2.15</a>  | <a href="#">0</a> | <a href="#">(34)</a> | <a href="#">0.01</a>     | <a href="#">1</a> | <a href="#">K.SMSILNSFVNDIFER.I</a> | <a href="#">1375</a> |                     |                     |

Proteins matching the same set of peptides:

[H2B2 YEAST](#) Mass: 14229 Score: 597 Queries matched: 20  
Histone H2B.2 OS=Saccharomyces cerevisiae GN=HTB2 PE=1 SV=2

3. [RL13A YEAST](#) Mass: 22540 Score: 232 Queries matched: 18 emPAI: 1.93  
60S ribosomal protein L13-A OS=Saccharomyces cerevisiae GN=RPL13A PE=1 SV=1

| Query                | Observed                  | Mr(expt)                  | Mr(calc)                  | ppm                    | Miss              | Score               | Expect                   | Rank              | Peptide                                           |                      |                      |                      |
|----------------------|---------------------------|---------------------------|---------------------------|------------------------|-------------------|---------------------|--------------------------|-------------------|---------------------------------------------------|----------------------|----------------------|----------------------|
| <a href="#">423</a>  | <a href="#">883.4380</a>  | <a href="#">882.4308</a>  | <a href="#">882.4460</a>  | <a href="#">-17.27</a> | <a href="#">1</a> | <a href="#">11</a>  | <a href="#">1.3</a>      | <a href="#">1</a> | <a href="#">R.KHWQER.V</a>                        | <a href="#">422</a>  |                      |                      |
| <a href="#">459</a>  | <a href="#">901.4444</a>  | <a href="#">900.4371</a>  | <a href="#">900.4454</a>  | <a href="#">-9.16</a>  | <a href="#">0</a> | <a href="#">8</a>   | <a href="#">3.8</a>      | <a href="#">1</a> | <a href="#">K.VHFDQAGK.K</a>                      |                      |                      |                      |
| <a href="#">536</a>  | <a href="#">964.5001</a>  | <a href="#">963.4928</a>  | <a href="#">963.5137</a>  | <a href="#">-21.70</a> | <a href="#">0</a> | <a href="#">18</a>  | <a href="#">0.43</a>     | <a href="#">1</a> | <a href="#">K.AAGLTAAYAR.T</a>                    |                      |                      |                      |
| <a href="#">552</a>  | <a href="#">981.5323</a>  | <a href="#">980.5251</a>  | <a href="#">980.5403</a>  | <a href="#">-15.56</a> | <a href="#">0</a> | <a href="#">9</a>   | <a href="#">3</a>        | <a href="#">1</a> | <a href="#">R.TIGIAVDHR.R</a>                     | <a href="#">553</a>  |                      |                      |
| <a href="#">825</a>  | <a href="#">1193.5463</a> | <a href="#">1192.5390</a> | <a href="#">1192.5473</a> | <a href="#">-6.90</a>  | <a href="#">0</a> | <a href="#">53</a>  | <a href="#">0.00012</a>  | <a href="#">1</a> | <a href="#">R.AVQDNGESAFR.T</a>                   | <a href="#">824</a>  |                      |                      |
| <a href="#">828</a>  | <a href="#">1194.5422</a> | <a href="#">1193.5349</a> | <a href="#">1193.5313</a> | <a href="#">3.07</a>   | <a href="#">0</a> | <a href="">(40)</a> | <a href="#">0.0027</a>   | <a href="#">1</a> | <a href="#">R.AVQDNGESAFR.T</a>                   |                      |                      |                      |
| <a href="#">829</a>  | <a href="#">1194.5422</a> | <a href="#">1193.5349</a> | <a href="#">1193.5313</a> | <a href="#">3.07</a>   | <a href="#">0</a> | <a href="">(31)</a> | <a href="#">0.021</a>    | <a href="#">1</a> | <a href="#">R.AVQDNGESAFR.T</a>                   |                      |                      |                      |
| <a href="#">1008</a> | <a href="#">1333.6390</a> | <a href="#">1332.6317</a> | <a href="#">1332.6422</a> | <a href="#">-7.87</a>  | <a href="#">0</a> | <a href="#">73</a>  | <a href="#">1.4e-006</a> | <a href="#">1</a> | <a href="#">R.NQEIFDANVQR.L</a>                   | <a href="#">1007</a> | <a href="#">1009</a> | <a href="#">1010</a> |
| <a href="#">1649</a> | <a href="#">2653.2180</a> | <a href="#">2652.2107</a> | <a href="#">2652.3395</a> | <a href="#">-48.54</a> | <a href="#">0</a> | <a href="#">84</a>  | <a href="#">8.8e-008</a> | <a href="#">1</a> | <a href="#">K.APEAEQVLSAAATFPIAQPATDVEAR.A</a>    | <a href="#">1650</a> |                      |                      |
| <a href="#">1666</a> | <a href="#">2953.3923</a> | <a href="#">2952.3850</a> | <a href="#">2952.4828</a> | <a href="#">-33.13</a> | <a href="#">1</a> | <a href="#">31</a>  | <a href="#">0.016</a>    | <a href="#">1</a> | <a href="#">R.NGKAPEAEQVLSAAATFPIAQPATDVEAR.A</a> | <a href="#">1667</a> |                      |                      |

4. [RL4A YEAST](#) Mass: 39068 Score: 200 Queries matched: 9 emPAI: 0.46  
60S ribosomal protein L4-A OS=Saccharomyces cerevisiae GN=RPL4A PE=1 SV=4

| Query                | Observed                  | Mr(expt)                  | Mr(calc)                  | ppm                    | Miss              | Score               | Expect                   | Rank              | Peptide                                       |                      |
|----------------------|---------------------------|---------------------------|---------------------------|------------------------|-------------------|---------------------|--------------------------|-------------------|-----------------------------------------------|----------------------|
| <a href="#">1118</a> | <a href="#">1444.6537</a> | <a href="#">1443.6464</a> | <a href="#">1443.6491</a> | <a href="#">-1.86</a>  | <a href="#">0</a> | <a href="#">70</a>  | <a href="#">2e-006</a>   | <a href="#">1</a> | <a href="#">K.AGHQTSAESWGTR.A</a>             | <a href="#">1117</a> |
| <a href="#">1270</a> | <a href="#">1630.8755</a> | <a href="#">1629.8682</a> | <a href="#">1629.8726</a> | <a href="#">-2.69</a>  | <a href="#">1</a> | <a href="#">9</a>   | <a href="#">2.9</a>      | <a href="#">1</a> | <a href="#">R.RGPLVVYAEADNGIVK.A</a>          | <a href="#">1269</a> |
| <a href="#">1442</a> | <a href="#">1881.0544</a> | <a href="#">1880.0471</a> | <a href="#">1880.0506</a> | <a href="#">-1.86</a>  | <a href="#">0</a> | <a href="#">100</a> | <a href="#">2.1e-009</a> | <a href="#">1</a> | <a href="#">K.IPEIPLVVSTDLESIQK.T</a>         | <a href="#">1443</a> |
| <a href="#">1538</a> | <a href="#">2112.0085</a> | <a href="#">2111.0012</a> | <a href="#">2111.1334</a> | <a href="#">-62.63</a> | <a href="#">0</a> | <a href="#">28</a>  | <a href="#">0.042</a>    | <a href="#">1</a> | <a href="#">R.IINSSEIQSAIRPAGQATQK.R</a>      | <a href="#">1537</a> |
| <a href="#">1647</a> | <a href="#">2611.4763</a> | <a href="#">2610.4690</a> | <a href="#">2610.4242</a> | <a href="#">17.2</a>   | <a href="#">0</a> | <a href="#">10</a>  | <a href="#">1.3</a>      | <a href="#">1</a> | <a href="#">R.NVPGVETANVASLNLQLAPGAHLGR.F</a> |                      |

Proteins matching the same set of peptides:

[RL4B YEAST](#) Mass: 39038 Score: 200 Queries matched: 9  
60S ribosomal protein L4-B OS=Saccharomyces cerevisiae GN=RPL4B PE=1 SV=2

5. [H4 YEAST](#) Mass: 11361 Score: 157 Queries matched: 6 emPAI: 1.32  
Histone H4 OS=Saccharomyces cerevisiae GN=HHF1 PE=1 SV=2

| Query               | Observed                  | Mr(expt)                  | Mr(calc)                  | ppm                    | Miss              | Score              | Expect                   | Rank              | Peptide                          |                     |                     |                     |
|---------------------|---------------------------|---------------------------|---------------------------|------------------------|-------------------|--------------------|--------------------------|-------------------|----------------------------------|---------------------|---------------------|---------------------|
| <a href="#">806</a> | <a href="#">1178.6044</a> | <a href="#">1177.5971</a> | <a href="#">1177.6343</a> | <a href="#">-31.54</a> | <a href="#">0</a> | <a href="#">51</a> | <a href="#">0.00027</a>  | <a href="#">1</a> | <a href="#">R.ISGLIYEEVR.A</a>   | <a href="#">805</a> |                     |                     |
| <a href="#">994</a> | <a href="#">1325.7372</a> | <a href="#">1324.7299</a> | <a href="#">1324.7463</a> | <a href="#">-12.34</a> | <a href="#">0</a> | <a href="#">71</a> | <a href="#">1.7e-006</a> | <a href="#">1</a> | <a href="#">R.DNIQGITKPAIR.R</a> | <a href="#">995</a> | <a href="#">996</a> | <a href="#">997</a> |

6. [TAF14 YEAST](#) Mass: 27423 Score: 156 Queries matched: 2 emPAI: 0.19  
Transcription initiation factor TFIID subunit 14 OS=Saccharomyces cerevisiae GN=TAF14 PE=1 SV=1

| Query                | Observed                  | Mr(expt)                  | Mr(calc)                  | ppm                  | Miss              | Score               | Expect                   | Rank              | Peptide                              |                      |
|----------------------|---------------------------|---------------------------|---------------------------|----------------------|-------------------|---------------------|--------------------------|-------------------|--------------------------------------|----------------------|
| <a href="#">1446</a> | <a href="#">1888.9402</a> | <a href="#">1887.9329</a> | <a href="#">1887.9248</a> | <a href="#">4.30</a> | <a href="#">0</a> | <a href="#">101</a> | <a href="#">2.1e-009</a> | <a href="#">1</a> | <a href="#">K.LNEDDLVGVVQMTDNK.T</a> | <a href="#">1447</a> |

7. [RL12 YEAST](#) Mass: 17812 Score: 155 Queries matched: 3 emPAI: 0.31  
60S ribosomal protein L12 OS=Saccharomyces cerevisiae GN=RPL12A PE=1 SV=1

| Query                | Observed                  | Mr(expt)                  | Mr(calc)                  | ppm                    | Miss              | Score               | Expect                   | Rank              | Peptide                                     |                      |
|----------------------|---------------------------|---------------------------|---------------------------|------------------------|-------------------|---------------------|--------------------------|-------------------|---------------------------------------------|----------------------|
| <a href="#">1316</a> | <a href="#">1707.8073</a> | <a href="#">1706.8000</a> | <a href="#">1706.8951</a> | <a href="#">-55.71</a> | <a href="#">0</a> | <a href="#">103</a> | <a href="#">1.2e-009</a> | <a href="#">1</a> | <a href="#">K.HSGNIQLDEIIEIAR.Q</a>         | <a href="#">1317</a> |
| <a href="#">1643</a> | <a href="#">2563.2266</a> | <a href="#">2562.2193</a> | <a href="#">2562.2602</a> | <a href="#">-15.94</a> | <a href="#">1</a> | <a href="#">4</a>   | <a href="#">9.1</a>      | <a href="#">2</a> | <a href="#">R.VDFKNPHDIEGINAGEIIEIPEN.-</a> |                      |

8. [RL19 YEAST](#) Mass: 21691 Score: 122 Queries matched: 9 emPAI: 0.56  
60S ribosomal protein L19 OS=Saccharomyces cerevisiae GN=RPL19A PE=1 SV=5

| Query                | Observed                  | Mr(expt)                  | Mr(calc)                  | ppm                    | Miss              | Score              | Expect                   | Rank              | Peptide                               |                     |                     |                     |                     |
|----------------------|---------------------------|---------------------------|---------------------------|------------------------|-------------------|--------------------|--------------------------|-------------------|---------------------------------------|---------------------|---------------------|---------------------|---------------------|
| <a href="#">787</a>  | <a href="#">1159.6066</a> | <a href="#">1158.5993</a> | <a href="#">1158.5629</a> | <a href="#">31.5</a>   | <a href="#">1</a> | <a href="#">21</a> | <a href="#">0.2</a>      | <a href="#">4</a> | <a href="#">K.ALNFEAEARR.L</a>        | <a href="#">784</a> | <a href="#">786</a> | <a href="#">788</a> | <a href="#">789</a> |
| <a href="#">1129</a> | <a href="#">1454.7131</a> | <a href="#">1453.7058</a> | <a href="#">1453.8041</a> | <a href="#">-67.62</a> | <a href="#">1</a> | <a href="#">1</a>  | <a href="#">17</a>       | <a href="#">7</a> | <a href="#">R.EARLPSQVVWIR.R</a>      |                     |                     |                     |                     |
| <a href="#">1470</a> | <a href="#">1929.8440</a> | <a href="#">1928.8367</a> | <a href="#">1928.9228</a> | <a href="#">-44.62</a> | <a href="#">0</a> | <a href="#">81</a> | <a href="#">1.6e-007</a> | <a href="#">1</a> | <a href="#">K.VWLDPNETSEIAQANSR.N</a> |                     |                     |                     |                     |

[1513](#) [2058.0264](#) [2057.0191](#) [2057.0177](#) 0.67 1 57 4.8e-005 1 [R.KVWLPNETSEIAQANSR.N](#) [1514](#)

9. [RL14A\\_YEAST](#) Mass: 15158 Score: 104 Queries matched: 3 emPAI: 0.88  
60S ribosomal protein L14-A OS=Saccharomyces cerevisiae GN=RPL14A PE=1 SV=1  
Query Observed Mr(expt) Mr(calc) ppm Miss Score Expect Rank Peptide  
[862](#) [1212.7017](#) [1211.6944](#) [1211.7125](#) -14.93 0 63 9.2e-006 1 [K.LAAIVEIIDQK.K](#) [863](#)  
[1509](#) [2051.2119](#) [2050.2046](#) [2050.1939](#) 5.23 0 37 0.0027 1 [R.QAINLGQVLTPLTFALPR.G](#)

Proteins matching the same set of peptides:

[RL14B\\_YEAST](#) Mass: 15144 Score: 104 Queries matched: 3  
60S ribosomal protein L14-B OS=Saccharomyces cerevisiae GN=RPL14B PE=1 SV=1

10. [RLA0\\_YEAST](#) Mass: 33745 Score: 100 Queries matched: 7 emPAI: 0.54  
60S acidic ribosomal protein P0 OS=Saccharomyces cerevisiae GN=RPP0 PE=1 SV=1  
Query Observed Mr(expt) Mr(calc) ppm Miss Score Expect Rank Peptide  
[907](#) [1242.6322](#) [1241.6249](#) [1241.6292](#) -3.40 1 33 0.011 1 [K.LREYLEEYK.S](#) [908](#)  
[933](#) [1267.6234](#) [1266.6161](#) [1266.6132](#) 2.29 0 59 3.4e-005 1 [R.GFLSDLPDFEK.L](#) [932](#)  
[945](#) [1283.5876](#) [1282.5803](#) [1282.6670](#) -67.56 0 7 4.3 1 [R.AGAVAPEDIWVR.A](#)  
[1540](#) [2131.0801](#) [2130.0728](#) [2130.0528](#) 9.40 0 42 0.0014 1 [K.SLFVVGVDNVSSQMQHEVR.K](#) [1541](#)

11. [RL33B\\_YEAST](#) Mass: 12161 Score: 92 Queries matched: 2 emPAI: 0.48  
60S ribosomal protein L33-B OS=Saccharomyces cerevisiae GN=RPL33B PE=1 SV=2  
Query Observed Mr(expt) Mr(calc) ppm Miss Score Expect Rank Peptide  
[1345](#) [1750.8683](#) [1749.8610](#) [1749.8937](#) -18.69 0 84 1.2e-007 1 [K.IEGVATPQEAQFYLGR.K](#) [1346](#)

12. [RSS\\_YEAST](#) Mass: 25023 Score: 89 Queries matched: 7 emPAI: 0.48  
40S ribosomal protein S5 OS=Saccharomyces cerevisiae GN=RPS5 PE=1 SV=3  
Query Observed Mr(expt) Mr(calc) ppm Miss Score Expect Rank Peptide  
[835](#) [1196.6398](#) [1195.6325](#) [1195.6462](#) -11.43 0 14 0.85 1 [R.QPIFVAHTAGR.Y](#) [834](#)  
[928](#) [1264.6189](#) [1263.6116](#) [1263.6459](#) -27.14 0 34 0.01 1 [K.DASLVVDYVQVR.Q](#) [927](#)  
[1015](#) [1339.7987](#) [1338.7914](#) [1338.7983](#) -5.14 0 58 2.2e-005 1 [R.VNQAIALLTIGAR.E](#) [1016](#)  
[1234](#) [1584.6962](#) [1583.6889](#) [1583.6919](#) -1.89 1 3 11 1 [R.LTNSLMMNGRNNGK.K](#)

13. [RS17A\\_YEAST](#) Mass: 15779 Score: 84 Queries matched: 4 emPAI: 0.84  
40S ribosomal protein S17-A OS=Saccharomyces cerevisiae GN=RPS17A PE=1 SV=1  
Query Observed Mr(expt) Mr(calc) ppm Miss Score Expect Rank Peptide  
[956](#) [1296.7513](#) [1295.7440](#) [1295.7561](#) -9.33 0 50 0.00021 1 [K.LPLSVINVAQR.D](#) [957](#)  
[1241](#) [1591.7026](#) [1590.6953](#) [1590.7889](#) -58.85 0 45 0.00078 1 [K.DQYVPEVSALDSR.S](#) [1242](#)

Proteins matching the same set of peptides:

[RS17B\\_YEAST](#) Mass: 15794 Score: 84 Queries matched: 4  
40S ribosomal protein S17-B OS=Saccharomyces cerevisiae GN=RPS17B PE=1 SV=1

14. [RIM1\\_YEAST](#) Mass: 15377 Score: 73 Queries matched: 7 emPAI: 0.87  
Single-stranded DNA-binding protein RIM1, mitochondrial OS=Saccharomyces cerevisiae GN=RIM1 PE=1 SV=1  
Query Observed Mr(expt) Mr(calc) ppm Miss Score Expect Rank Peptide  
[1276](#) [1643.9235](#) [1642.9162](#) [1642.9505](#) -20.87 1 32 0.014 2 [K.GTTLSLVQKDIINLLK.N](#) [1275](#)  
[1296](#) [1676.7678](#) [1675.7605](#) [1675.7550](#) 3.29 0 52 0.00017 1 [R.IGSEFTEHTSANNNR.Y](#) [1295](#)  
[1501](#) [2014.9335](#) [2013.9262](#) [2014.0160](#) -44.56 1 15 0.74 2 [R.KGALVYVEADAANYVFER.D](#)  
[1521](#) [2082.9358](#) [2081.9285](#) [2081.9654](#) -17.69 1 18 0.31 1 [R.IGSEFTEHTSANNNRYLK.Y](#)  
[1522](#) [2082.9358](#) [2081.9285](#) [2081.9654](#) -17.69 1 (14) 0.79 3 [R.IGSEFTEHTSANNNRYLK.Y](#)

15. [H2A1\\_YEAST](#) Mass: 13981 Score: 70 Queries matched: 6 emPAI: 1.80  
Histone H2A.1 OS=Saccharomyces cerevisiae GN=HTA1 PE=1 SV=2  
Query Observed Mr(expt) Mr(calc) ppm Miss Score Expect Rank Peptide  
[143](#) [850.4579](#) [849.4506](#) [849.5184](#) -79.85 0 37 0.006 1 [R.HLQLAIR.N](#) [142](#)  
[482](#) [917.4772](#) [916.4699](#) [916.5131](#) -47.10 0 41 0.0026 1 [K.AGLTFPVGR.V](#) [481](#)  
[1631](#) [2409.3350](#) [2408.3277](#) [2408.3904](#) -26.00 0 35 0.0048 1 [K.LLGNVTIAQGGVLPNIHQNLPLK.K](#) [1630](#)

Proteins matching the same set of peptides:

[H2A2\\_YEAST](#) Mass: 13981 Score: 70 Queries matched: 6  
Histone H2A.2 OS=Saccharomyces cerevisiae GN=HTA2 PE=1 SV=2

16. [ACT\\_YEAST](#) Mass: 41663 Score: 64 Queries matched: 2 emPAI: 0.12  
Actin OS=Saccharomyces cerevisiae GN=ACT1 PE=1 SV=1  
Query Observed Mr(expt) Mr(calc) ppm Miss Score Expect Rank Peptide  
[1381](#) [1790.8209](#) [1789.8136](#) [1789.8846](#) -39.67 0 51 0.00018 1 [K.SYELPDGQVITIGNER.F](#) [1382](#)

17. [RL6A\\_YEAST](#) Mass: 19949 Score: 61 Queries matched: 5 emPAI: 0.62  
60S ribosomal protein L6-A OS=Saccharomyces cerevisiae GN=RPL6A PE=1 SV=2  
Query Observed Mr(expt) Mr(calc) ppm Miss Score Expect Rank Peptide  
[592](#) [1017.4751](#) [1016.4678](#) [1016.4967](#) -28.43 0 46 0.00064 1 [K.FNVEYFAK.E](#) [591](#)

[849](#) [1202.5614](#) [1201.5541](#) [1201.5914](#) -31.00 1 5 8 1 [K.NGDKPHMLKF.-](#)  
[1156](#) [1479.9226](#) [1478.9153](#) [1478.9184](#) -2.11 0 22 0.058 1 [R.ASLVPGTVLILLAGR.F](#) [1155](#)

18. [H3\\_YEAST](#) Mass: 15347 Score: 57 Queries matched: 4 emPAI: 0.37  
 Histone H3 OS=Saccharomyces cerevisiae GN=HHT1 PE=1 SV=2  
 Query Observed Mr(expt) Mr(calc) ppm Miss Score Expect Rank Peptide  
[574](#) [1004.5665](#) [1003.5592](#) [1003.5815](#) -22.15 0 52 0.00018 1 [R.YKPGTVALR.E](#) [575](#) [576](#) [577](#)

19. [RL1\\_YEAST](#) Mass: 24470 Score: 51 Queries matched: 2 emPAI: 0.22  
 60S ribosomal protein L1 OS=Saccharomyces cerevisiae GN=RPL1A PE=1 SV=1  
 Query Observed Mr(expt) Mr(calc) ppm Miss Score Expect Rank Peptide  
[1422](#) [1845.9209](#) [1844.9136](#) [1844.9057](#) 4.29 1 51 0.00018 1 [K.AGKFPTPVSHNDLYGK.V](#) [1423](#)

20. [RL39\\_YEAST](#) Mass: 6338 Score: 43 Queries matched: 3 emPAI: 1.08  
 60S ribosomal protein L39 OS=Saccharomyces cerevisiae GN=RPL39 PE=1 SV=3  
 Query Observed Mr(expt) Mr(calc) ppm Miss Score Expect Rank Peptide  
[978](#) [1307.6797](#) [1306.6724](#) [1306.7258](#) -40.86 0 5 8.7 1 [K.QNRPLPQWIR.L](#)  
[1110](#) [1435.8182](#) [1434.8109](#) [1434.8208](#) -6.86 1 38 0.0035 1 [K.QNRPLPQWIR.L](#) [1109](#)

21. [RS15\\_YEAST](#) Mass: 15992 Score: 42 Queries matched: 2 emPAI: 0.35  
 40S ribosomal protein S15 OS=Saccharomyces cerevisiae GN=RPS15 PE=1 SV=1  
 Query Observed Mr(expt) Mr(calc) ppm Miss Score Expect Rank Peptide  
[1076](#) [1391.7618](#) [1390.7545](#) [1390.7568](#) -1.65 0 40 0.0026 1 [K.LAAPENKPAVPR.T](#) [1077](#)

22. [RL7A\\_YEAST](#) Mass: 27621 Score: 37 Queries matched: 7 emPAI: 0.19  
 60S ribosomal protein L7-A OS=Saccharomyces cerevisiae GN=RPL7A PE=1 SV=3  
 Query Observed Mr(expt) Mr(calc) ppm Miss Score Expect Rank Peptide  
[878](#) [1219.5929](#) [1218.5856](#) [1218.5894](#) -3.11 0 1 21 4 [K.HFIQGSFGNR.E](#)  
[883](#) [1226.5504](#) [1225.5431](#) [1225.6204](#) -63.03 0 13 0.91 1 [K.LSNPSGGWGVPR.K](#) [884](#)  
[1490](#) [1979.9709](#) [1978.9636](#) [1978.9650](#) -0.67 1 37 0.0047 1 [K.HFIQGSFGNREEFINK.L](#) [1488](#) [1489](#) [1491](#)

Proteins matching the same set of peptides:

[RL7B\\_YEAST](#) Mass: 27679 Score: 37 Queries matched: 7  
 60S ribosomal protein L7-B OS=Saccharomyces cerevisiae GN=RPL7B PE=1 SV=3

23. [EAF6\\_YEAST](#) Mass: 12887 Score: 34 Queries matched: 2 emPAI: 0.45  
 Chromatin modification-related protein EAF6 OS=Saccharomyces cerevisiae GN=EAF6 PE=1 SV=1  
 Query Observed Mr(expt) Mr(calc) ppm Miss Score Expect Rank Peptide  
[1320](#) [1708.7250](#) [1707.7177](#) [1707.7098](#) 4.64 0 34 0.007 1 [K.SHSHADSAFNNDR.I](#) [1319](#)

24. [RL25\\_YEAST](#) Mass: 15748 Score: 33 Queries matched: 2 emPAI: 0.36  
 60S ribosomal protein L25 OS=Saccharomyces cerevisiae GN=RPL25 PE=1 SV=4  
 Query Observed Mr(expt) Mr(calc) ppm Miss Score Expect Rank Peptide  
[1120](#) [1446.7407](#) [1445.7334](#) [1445.7436](#) -7.01 0 31 0.021 1 [K.VIEQPITSETAMK.K](#) [1119](#)

25. [RL33A\\_YEAST](#) Mass: 12147 Score: 33 Queries matched: 1 emPAI: 0.48  
 60S ribosomal protein L33-A OS=Saccharomyces cerevisiae GN=RPL33A PE=1 SV=3  
 Query Observed Mr(expt) Mr(calc) ppm Miss Score Expect Rank Peptide  
[1334](#) [1736.8760](#) [1735.8687](#) [1735.8781](#) -5.40 0 33 0.012 1 [K.IEGVATPQDAQFYLGK.R](#)

26. [RL18\\_YEAST](#) Mass: 20551 Score: 33 Queries matched: 8 emPAI: 0.27  
 60S ribosomal protein L18 OS=Saccharomyces cerevisiae GN=RPL18A PE=1 SV=1  
 Query Observed Mr(expt) Mr(calc) ppm Miss Score Expect Rank Peptide  
[475](#) [910.4159](#) [909.4087](#) [909.4279](#) -21.19 0 30 0.017 1 [R.HFGMGPHK.G](#) [476](#)  
[477](#) [914.5159](#) [913.5086](#) [913.5345](#) -28.36 0 14 0.86 3 [K.GQNTLILR.G](#) [478](#)  
[734](#) [1124.6393](#) [1123.6320](#) [1123.6462](#) -12.60 0 6 4.1 2 [K.INRPPVSVSR.I](#) [736](#)  
[1004](#) [1331.7097](#) [1330.7024](#) [1330.7093](#) -5.16 0 24 0.12 1 [K.TVVVGTVDDAR.I](#) [1005](#)

27. [RL27A\\_YEAST](#) Mass: 15522 Score: 32 Queries matched: 4 emPAI: 0.36  
 60S ribosomal protein L27-A OS=Saccharomyces cerevisiae GN=RPL27A PE=1 SV=1  
 Query Observed Mr(expt) Mr(calc) ppm Miss Score Expect Rank Peptide  
[1159](#) [1490.7744](#) [1489.7671](#) [1489.7790](#) -7.97 0 12 1.8 1 [K.SHPFGHALVAGIER.Y](#) [1160](#)  
[1244](#) [1594.7565](#) [1593.7492](#) [1593.7635](#) -8.94 0 32 0.014 1 [K.SVSTETFEQPSQR.E](#) [1243](#)

Proteins matching the same set of peptides:

[RL27B\\_YEAST](#) Mass: 15496 Score: 32 Queries matched: 4  
 60S ribosomal protein L27-B OS=Saccharomyces cerevisiae GN=RPL27B PE=1 SV=1

28. [PIB2\\_YEAST](#) Mass: 70574 Score: 32 Queries matched: 2 emPAI: 0.07  
 Phosphatidylinositol-3-phosphate-binding protein 2 OS=Saccharomyces cerevisiae GN=PIB2 PE=1 SV=1

Query Observed Mr(expt) Mr(calc) ppm Miss Score Expect Rank Peptide  
[1139](#) 1471.7726 1470.7653 1470.7864 -14.35 0 32 0.017 1 K.QQIQSPAMVSILR.K [1140](#)

29. [RL30\\_YEAST](#) Mass: 11408 Score: 31 Queries matched: 1 emPAI: 0.52  
60S ribosomal protein L30 OS=Saccharomyces cerevisiae GN=RPL30 PE=1 SV=3

Query Observed Mr(expt) Mr(calc) ppm Miss Score Expect Rank Peptide  
[1398](#) 1816.8730 1815.8657 1815.8792 -7.40 0 31 0.021 1 K.VVYFQGGNNELGTAVGK.L

30. [RS19A\\_YEAST](#) Mass: 15907 Score: 30 Queries matched: 3 emPAI: 0.35  
40S ribosomal protein S19-A OS=Saccharomyces cerevisiae GN=RPS19A PE=1 SV=2

Query Observed Mr(expt) Mr(calc) ppm Miss Score Expect Rank Peptide  
[1468](#) 1928.9600 1927.9527 1927.9428 5.14 0 30 0.022 1 R.DVAAQDFINAYASFLQR.Q [1469](#)  
[1576](#) 2199.9216 2198.9143 2198.9691 -24.91 1 13 0.92 1 K.TSSGNEMPPQDAEGWFYKR.A

Proteins matching the same set of peptides:

[RS19B\\_YEAST](#) Mass: 15881 Score: 30 Queries matched: 3  
40S ribosomal protein S19-B OS=Saccharomyces cerevisiae GN=RPS19B PE=1 SV=2

31. [TOR2\\_YEAST](#) Mass: 281390 Score: 30 Queries matched: 6 emPAI: 0.02  
Serine/threonine-protein kinase TOR2 OS=Saccharomyces cerevisiae GN=TOR2 PE=1 SV=3

Query Observed Mr(expt) Mr(calc) ppm Miss Score Expect Rank Peptide  
[3](#) 816.4480 815.4407 815.4501 -11.48 0 30 0.033 3 R.LAANTLGR.L [4](#)  
[759](#) 1147.6195 1146.6122 1146.6430 -26.87 1 12 1.7 7 K.AALSIEKMR.I  
[1039](#) 1358.6974 1357.6901 1357.7275 -27.55 0 1 23 2 R.VLIPSSDIEVMR.L [1037](#)  
[1550](#) 2154.9753 2153.9680 2154.1797 -98.26 0 4 8 1 R.IHSPVLVDQAEVSHELIR.M

32. [TAF9\\_YEAST](#) Mass: 17304 Score: 28 Queries matched: 2 emPAI: 0.32  
Transcription initiation factor TFIID subunit 9 OS=Saccharomyces cerevisiae GN=TAF9 PE=1 SV=1

Query Observed Mr(expt) Mr(calc) ppm Miss Score Expect Rank Peptide  
[818](#) 1190.6544 1189.6471 1189.6012 38.6 0 28 0.044 1 K.ELMLQLAAER.N [819](#)

33. [RDH54\\_YEAST](#) Mass: 104087 Score: 27 Queries matched: 6 emPAI: 0.05  
DNA repair and recombination protein RDH54 OS=Saccharomyces cerevisiae GN=RDH54 PE=1 SV=2

Query Observed Mr(expt) Mr(calc) ppm Miss Score Expect Rank Peptide  
[16](#) 823.3502 822.3429 822.3065 44.2 0 1 14 10 R.NSPDMDK.M  
[831](#) 1194.5613 1193.5540 1193.5961 -35.29 1 27 0.052 1 R.QLMKNLSLQK.F [828](#) [830](#)  
[928](#) 1264.6189 1263.6116 1263.5587 41.9 1 12 1.8 8 R.NSPDMDKMAVR.N [927](#)

34. [GAL7\\_YEAST](#) Mass: 42358 Score: 26 Queries matched: 2 emPAI: 0.12  
Galactose-1-phosphate uridylyltransferase OS=Saccharomyces cerevisiae GN=GAL7 PE=1 SV=4

Query Observed Mr(expt) Mr(calc) ppm Miss Score Expect Rank Peptide  
[40](#) 842.4913 841.4840 841.4406 51.6 0 26 0.04 1 R.ATGNLNPR.Y [41](#)

35. [YNG1\\_YEAST](#) Mass: 25334 Score: 26 Queries matched: 2 emPAI: 0.21  
Protein YNG1 OS=Saccharomyces cerevisiae GN=YNG1 PE=1 SV=1

Query Observed Mr(expt) Mr(calc) ppm Miss Score Expect Rank Peptide  
[1605](#) 2294.9866 2293.9793 2294.0558 -33.36 1 26 0.046 1 R.LMQTIDLFKNEDEPGMER.A [1606](#)

36. [RL20\\_YEAST](#) Mass: 20424 Score: 26 Queries matched: 1 emPAI: 0.27  
60S ribosomal protein L20 OS=Saccharomyces cerevisiae GN=RPL20A PE=1 SV=2

Query Observed Mr(expt) Mr(calc) ppm Miss Score Expect Rank Peptide  
[1457](#) 1907.9803 1906.9730 1906.9748 -0.94 0 26 0.06 1 K.ASGEIVSINQINEAHPK.V

37. [RS29A\\_YEAST](#) Mass: 6656 Score: 25 Queries matched: 2 emPAI: 1.01  
40S ribosomal protein S29-A OS=Saccharomyces cerevisiae GN=RPS29A PE=1 SV=3

Query Observed Mr(expt) Mr(calc) ppm Miss Score Expect Rank Peptide  
[1067](#) 1379.6636 1378.6563 1378.6531 2.37 0 25 0.081 1 M.AHENVWFSHPR.R [1066](#)

Proteins matching the same set of peptides:

[RS29B\\_YEAST](#) Mass: 6723 Score: 25 Queries matched: 2  
40S ribosomal protein S29-B OS=Saccharomyces cerevisiae GN=RPS29B PE=1 SV=3
