# Supplementary material for: Comprehensive analysis of interacting proteins and genome-wide location studies of the Sas3-dependent NuA3 histone acetyltransferase complex
Source: PubMed Central journal article supplement — FEBS Open Bio. 2014 Nov 8;4:996–1006. doi: 10.1016/j.fob.2014.11.001 (PMC4248121; doi:10.1016/j.fob.2014.11.001), 2014-11-08
Supplement: mmc2.pdf [file mmc2.pdf]

## INFORME MASAS: REGISTRO 2010\_135

ANÁLISIS REALIZADO POR: Dra Luz Valero

### DATOS:

Número de muestras: 1

Disponemos de dos alícuotas en solución con un volumen de aproximadamente 100 uL

Observaciones: Se incluye en el procesado de las muestras un plug de Mioglobina de 75 ng como control de la digestión y un blanco con los reactivos para determinar el origen de una posible contaminación por queratinas

### PREPARACIÓN DE LA MUESTRA:

Las alícuotas presentan un precipitado marrón. Centrifugamos y tomamos los sobrenadantes  
Se cuantifican los sobrenadantes (4 uL) con Bioanalyzer de Agilent.

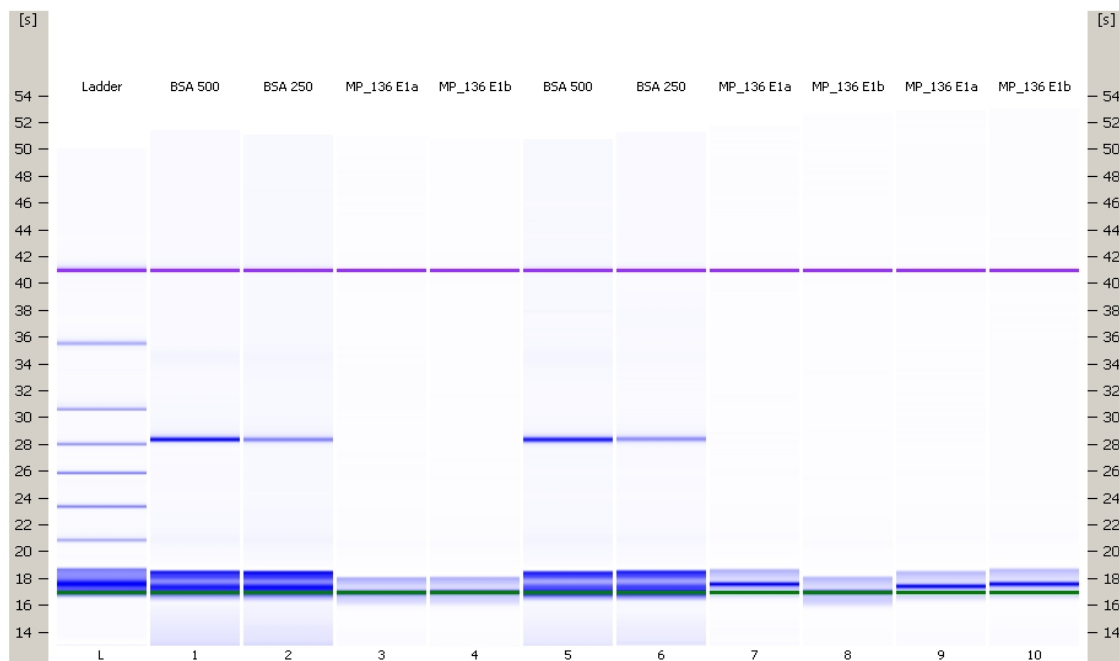

NO se aprecian bandas de proteína en la muestra por lo que no podemos cauntificarla.

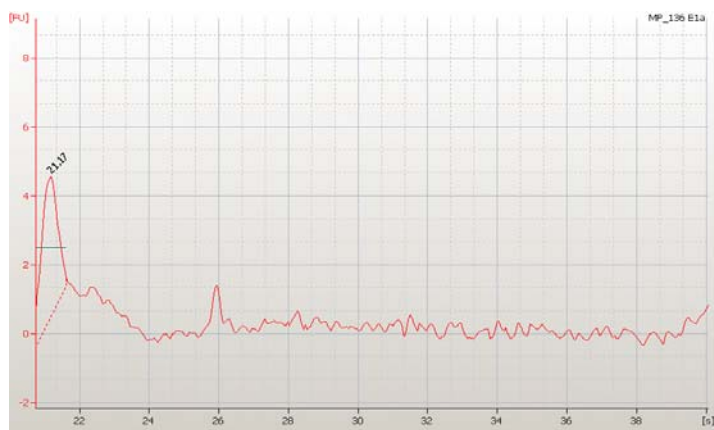

Una ampliación del electroferograma tampoco permite detectar bandas de proteína

### DIGESTIÓN:

Tripsina: **100 ng en 50 mM AmBic pH8**

Tiempo de incubación: **37°C on**

Parar la reacción con 10 uL de TFA 10%, medir pH:1

Se combinan los digeridos y se concentran en speed vac a 6 uL

**Se digieren igual los pellets de color marrón presentes en los tubos aunque no es posible disolverlos**

## ESPECTROMETRÍA DE MASAS

### MALDI-TOF TOF (4700 PA)

Se analiza el pellet precipitado digerido para detectar la presencia de péptidos tripticos

| SPOTEO DIRECTO         |            |
|------------------------|------------|
| Spot Set: 100727       |            |
| Muestra                | Posiciones |
| <b>Control</b>         | <b>A4</b>  |
| <b>Blanco</b>          | <b>A7</b>  |
| <b>Pellet digerido</b> | <b>F5</b>  |

run 30/31

Antes del análisis de las muestras se calibra la placa y los métodos de adquisición. Se adquieren los espectros de MALDI TOF MS en modo reflectrón positivo (4700 Proteomica Analyzer, ABI) y se seleccionan automáticamente 5 iones entre aquéllos de mayor intensidad, excluidos los que corresponden a contaminaciones conocidas. Se realiza una calibración interna con los picos de autodigestión de la tripsina. Se obtiene el espectro de fragmentación de cada uno de estos iones (1kV, CID on con air medium pressure). Se realiza una inspección visual de la calidad de los espectros. En caso de no obtener una identificación positiva se concentra la muestra por evaporación y vuelve a analizarse de la misma forma.

**NO DETECTAMOS LA PRESENCIA DE PÉPTIDOS TRÍPTICOS EN EL DIGERIDO DEL PELLETT DE LAS MUESTRAS**

### ANÁLISIS DE RESULTADOS

GPS: **2010\_135 (MP)**

La información combinada de MS y MSMS se envía conjuntamente a través del software GPS (Applied Biosystems) a un servidor de MASCOT residente.

[http://www.matrixscience.com/search\\_intro.html](http://www.matrixscience.com/search_intro.html)

BASES DE DATOS: SwissProt

### nanoLC MALDITOF (4700 PA, ABSciex)

Método Cromatográfico: **5a45\_120min**

Vinyección: 5 uL

El 50% de la muestra se carga en una trap column ( LC Packings PepMap C18, 300 um x 5 mm; Amsterdam The Netherlands)

via un flujo isocratico de 0.1% TFA a 40 uL/min durante 3 min.

De la precolumna los peptidos se influjan en la columna analitica ( LC Packings PepMap C18 3 u 100 Å, 75 um x 15 cm; Amsterdam The Netherlands) y se eluyen con un gradiente lineal

5a50%B en una placa para espectrometro de masas MALDITOF.

Simultáneamente se deposita matriz ACH en cada fracción colectada. La matriz contiene 30 fmol/uL de GluFib como calibrante interno. A: 0.1% FA; B: 95% ACN, 0.1% FA

Las fracciones colectadas se analizan como 'wide-job run' en el espectrómetro 4700 PA

| Spot Set: LC100803        |              |             |
|---------------------------|--------------|-------------|
| Muestra                   | Posiciones   | run         |
| <b>Muestras combinada</b> | <b>1-576</b> | <b>9/10</b> |

Antes del análisis de las muestras se calibra la placa y los métodos de adquisición. Se adquieren los espectros de MALDI TOF MS en modo reflectrón positivo (4700 Proteomica Analyzer, ABI) y se seleccionan automáticamente 5 iones entre aquéllos de mayor intensidad, excluidos los que corresponden a contaminaciones conocidas. Se realiza una calibración interna con GluFib. Se obtiene el espectro de fragmentación de cada uno de estos iones (1kV, CID medium pressure).

### ANÁLISIS DE RESULTADOS

MASCOT: 2010\_135 (MP)

La información combinada de MSMS del analisis se envía conjuntamente a MASCOT (v2.2) a través del software GPS 3.6 (ABI).

**BASES DE DATOS:** SwissProt

Antes del análisis se calibra el instrumento y se analizan 200 fmol de una mezcla de 6 proteínas digeridas como control del mismo (LC Packings)

### Control Sensibilidad nanoLC MALDITOF

| Significant hits: | SCORE |
|-------------------|-------|
| TRFE_BOVIN        | 1113  |
| ALBU_BOVIN        | 892   |
| BGAL_ECOLC        | 613   |
| ADH1_YEAST        | 413   |
| CYC_BOVIN         | 247   |
| LYSC_CHICK        | 245   |

#### Probability Based Mowse Score

Ions score is  $-10 \cdot \log(P)$ , where P is the probability that the observed match is a random event.

Individual ions scores > 43 indicate identity or extensive homology ( $p < 0.05$ ).

Protein scores are derived from ions scores as a non-probabilistic basis for ranking protein hits.

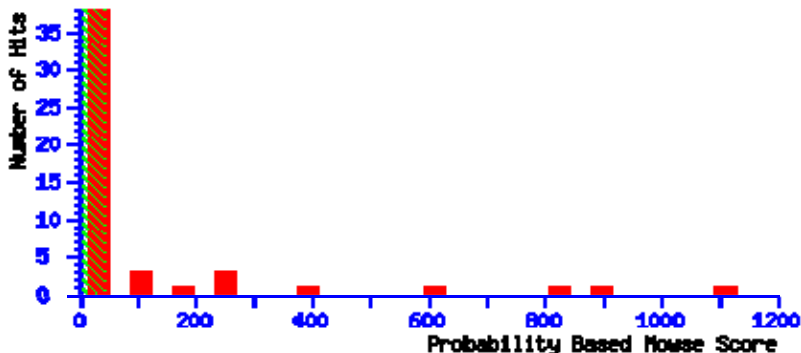

### Análisis muestra

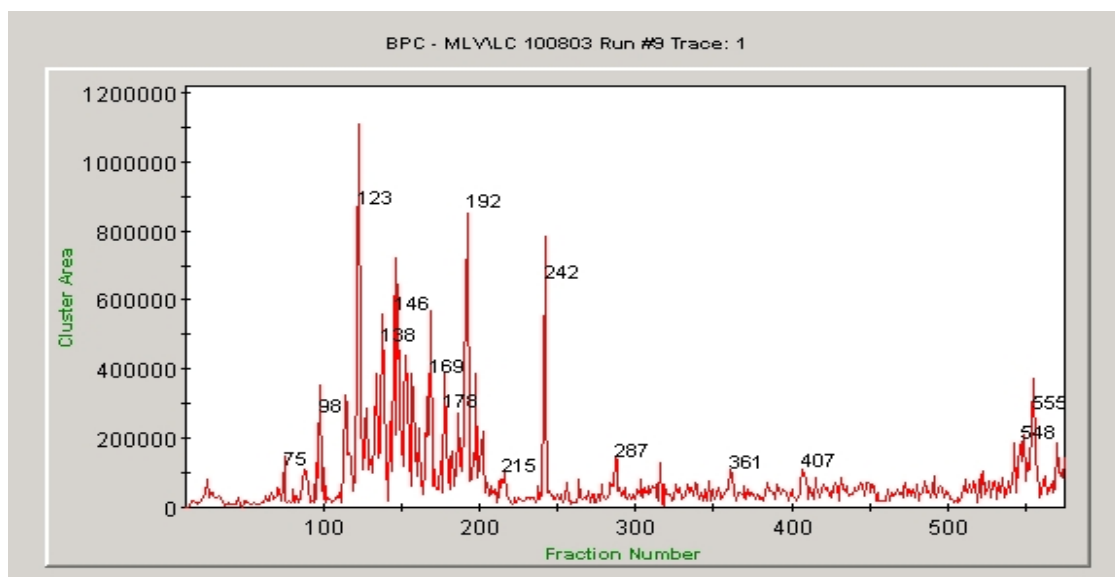

## INFORME MASAS: REGISTRO 2010\_135

ANÁLISIS REALIZADO POR: [Dra Luz Valero](#)

### IDENTIFICACIONES

#### CONTROL DIGESTION

TOP SCORE: 282 for **ALBU\_BOVIN**, Serum albumin

### Probability Based Mowse Score

Ions score is  $-10 \cdot \log(P)$ , where P is the probability that the observed match is a random event.

Protein scores greater than 70 are significant ( $p < 0.05$ ).

Protein scores are derived from ions scores as a non-probabilistic basis for ranking protein hits.

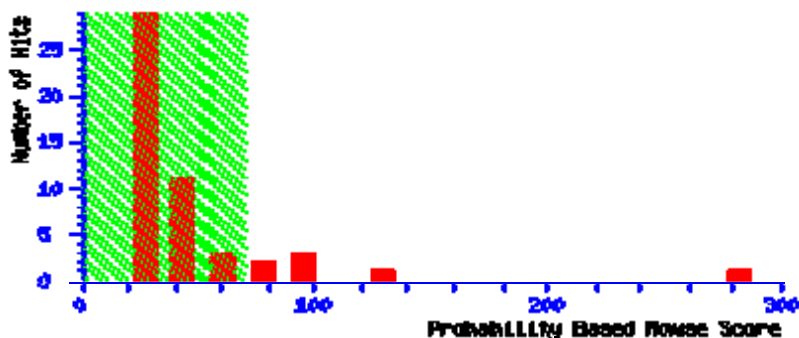

#### ANÁLISIS MUESTRAS

### ANÁLISIS MASCOT

MS data file : pps\_LC 100803\_1280933241.txt

Database : Sprot 20100224 (514789 sequences; 181163771 residues)

Taxonomy : Saccharomyces Cerevisiae (baker's yeast) (6552 sequences)

#### Search Parameters

Type of search : MS/MS Ion Search

Error tolerant search : All significant protein hits

Enzyme : Trypsin

Fixed modifications : Carbamidomethyl (C)

Mass values : Monoisotopic

Protein Mass : Unrestricted

Peptide Mass Tolerance :  $\pm 100$  ppm

Fragment Mass Tolerance:  $\pm 0.6$  Da

Max Missed Cleavages : 1

Instrument type : MALDI-TOF-TOF

Number of queries : 883

## Probability Based Mowse Score

Ions score is  $-10 \cdot \log(P)$ , where P is the probability that the observed match is a random event.

Individual ions scores  $> 21$  indicate identity or extensive homology ( $p < 0.05$ ).

Protein scores are derived from ions scores as a non-probabilistic basis for ranking protein hits.

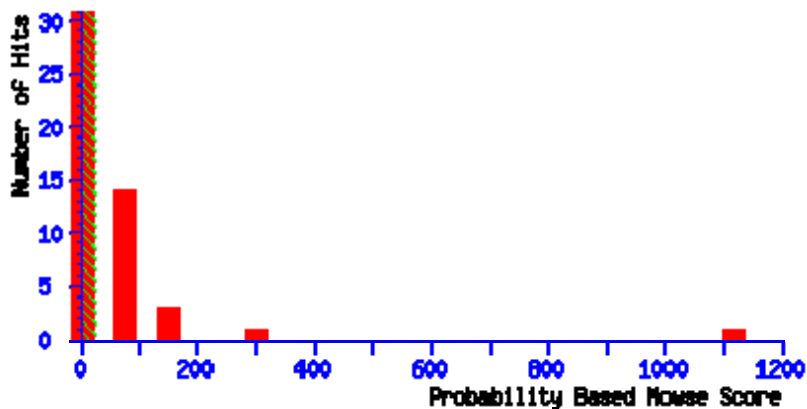

Protein hits :

|             |                                                                                     |
|-------------|-------------------------------------------------------------------------------------|
| YL455_YEAST | PWWP domain-containing protein YLR455W OS=Saccharomyces cerevisiae                  |
| H2B1_YEAST  | Histone H2B.1 OS=Saccharomyces cerevisiae GN=HTB1 PE=1 SV=2                         |
| RL13B_YEAST | 60S ribosomal protein L13-B OS=Saccharomyces cerevisiae GN=RPL13B PE=1 SV=1         |
| RL4A_YEAST  | 60S ribosomal protein L4-A OS=Saccharomyces cerevisiae GN=RPL4A PE=1 SV=4           |
| RL19_YEAST  | 60S ribosomal protein L19 OS=Saccharomyces cerevisiae GN=RPL19A PE=1 SV=5           |
| RL12_YEAST  | 60S ribosomal protein L12 OS=Saccharomyces cerevisiae GN=RPL12A PE=1 SV=1           |
| TAF14_YEAST | Transcription initiation factor TFIID subunit 14 OS=Saccharomyces cerevisiae        |
| H4_YEAST    | Histone H4 OS=Saccharomyces cerevisiae GN=HHF1 PE=1 SV=2                            |
| RL33B_YEAST | 60S ribosomal protein L33-B OS=Saccharomyces cerevisiae GN=RPL33B PE=1 SV=2         |
| RLA0_YEAST  | 60S acidic ribosomal protein P0 OS=Saccharomyces cerevisiae GN=RPP0 PE=1 SV=1       |
| RL14A_YEAST | 60S ribosomal protein L14-A OS=Saccharomyces cerevisiae GN=RPL14A PE=1 SV=1         |
| RS17A_YEAST | 40S ribosomal protein S17-A OS=Saccharomyces cerevisiae GN=RPS17A PE=1 SV=1         |
| RS5_YEAST   | 40S ribosomal protein S5 OS=Saccharomyces cerevisiae GN=RPS5 PE=1 SV=3              |
| H2A1_YEAST  | Histone H2A.1 OS=Saccharomyces cerevisiae GN=HTA1 PE=1 SV=2                         |
| RIM1_YEAST  | Single-stranded DNA-binding protein RIM1, mitochondrial OS=Saccharomyces cerevisiae |
| ACT_YEAST   | Actin OS=Saccharomyces cerevisiae GN=ACT1 PE=1 SV=1                                 |
| RL1_YEAST   | 60S ribosomal protein L1 OS=Saccharomyces cerevisiae GN=RPL1A PE=1 SV=1             |
| RL6A_YEAST  | 60S ribosomal protein L6-A OS=Saccharomyces cerevisiae GN=RPL6A PE=1 SV=2           |
| RS15_YEAST  | 40S ribosomal protein S15 OS=Saccharomyces cerevisiae GN=RPS15 PE=1 SV=1            |
| RL7A_YEAST  | 60S ribosomal protein L7-A OS=Saccharomyces cerevisiae GN=RPL7A PE=1 SV=3           |
| RL33A_YEAST | 60S ribosomal protein L33-A OS=Saccharomyces cerevisiae GN=RPL33A PE=1 SV=3         |
| RL30_YEAST  | 60S ribosomal protein L30 OS=Saccharomyces cerevisiae GN=RPL30 PE=1 SV=3            |
| RL25_YEAST  | 60S ribosomal protein L25 OS=Saccharomyces cerevisiae GN=RPL25 PE=1 SV=4            |
| H3_YEAST    | Histone H3 OS=Saccharomyces cerevisiae GN=HHT1 PE=1 SV=2                            |
| RS19A_YEAST | 40S ribosomal protein S19-A OS=Saccharomyces cerevisiae GN=RPS19A PE=1 SV=2         |
| RL39_YEAST  | 60S ribosomal protein L39 OS=Saccharomyces cerevisiae GN=RPL39 PE=1 SV=3            |
| YNG1_YEAST  | Protein YNG1 OS=Saccharomyces cerevisiae GN=YNG1 PE=1 SV=1                          |
| RL20_YEAST  | 60S ribosomal protein L20 OS=Saccharomyces cerevisiae GN=RPL20A PE=1 SV=2           |
| RCA1_YEAST  | Mitochondrial respiratory chain complexes assembly protein RCA1                     |
| RL18_YEAST  | 60S ribosomal protein L18 OS=Saccharomyces cerevisiae GN=RPL18A PE=1 SV=1           |
| SIN3_YEAST  | Transcriptional regulatory protein SIN3 OS=Saccharomyces cerevisiae GN=SIN3         |
| RL27A_YEAST | 60S ribosomal protein L27-A OS=Saccharomyces cerevisiae GN=RPL27A PE=1 SV=1         |

## ANÁLISIS PROTEIN PILOT

### ANALYSIS PARAMETERS

MS/MS Job Run: (10) 8/3/2010 9:50:08 PM, Chromatogram(s): 1, Parent Job Run: (9) 8/3/2010 6:56:58 PM

Sample Type: Identification  
Cys. Alkylation: None  
Digestion: Trypsin  
Instrument: 4700  
Special Factors: NO  
Species: Saccharomyces cerevisiae  
ID Focus: Biological modifications  
Database: Spot\_20100224.fasta  
Search Effort: Thorough  
FDR Analysis: No  
User Modified Parar Yes

| Protein ID                                                                                                     |                   | Spectra                  |                   |                    |                 |
|----------------------------------------------------------------------------------------------------------------|-------------------|--------------------------|-------------------|--------------------|-----------------|
| <b>ID Statistics (Protein-Thresholded): 1701 total spectra, 1701 non-empty spectra; 6553 proteins searched</b> |                   |                          |                   |                    |                 |
| Unused (Conf) Cutoff                                                                                           | Proteins Detected | Proteins Before Grouping | Distinct Peptides | Spectra Identified | % Total Spectra |
| >2.0 (99)                                                                                                      | 16                | 25                       | 138               | 266                | 15.6            |
| >1.3 (95)                                                                                                      | 30                | 41                       | 180               | 333                | 19.6            |
| >0.47 (66)                                                                                                     | 37                | 50                       | 211               | 384                | 22.6            |
| Cutoff Applied: >1.3 (95%)                                                                                     | 30                | 41                       | 180               | 333                | 19.6            |

SE ADJUNTA AL INFORME FICHEROS DE TEXTO CON LAS PROTEÍNAS IDENTIFICADAS Y CON LA ASIGNACIÓN DE LOS DIFERENTES PÉPTIDOS.

[MP 2010\\_135 2adquisiciones\\_PeptideSummary.txt](#)

[MP 2010\\_135 2adquisiciones\\_ProteinSummary.txt](#)
